# Supplementary material
Source: ML conference proceedings conference paper supplement (https://openreview.net/forum?id=FQepisCUWu)

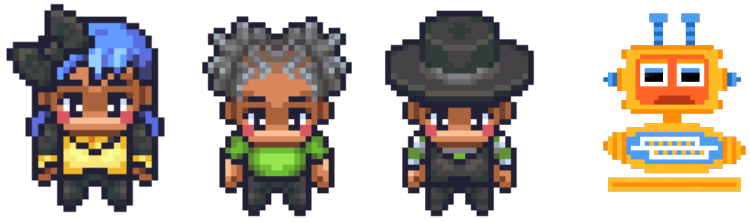

# Large Language Model (LLM) based agent

## Single-agent method

Question: How can I improve my time management skills?

**ASSISTANT1:** Improving your time management skills involves ...

**ASSISTANT2:** Here are some tips to improve your time management, like ...

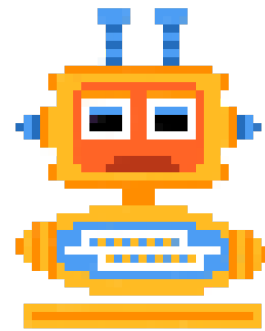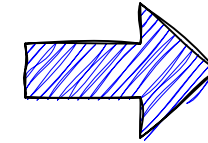

After carefully reviewing the responses of both response ... I think **ASSISTANT1** is better.

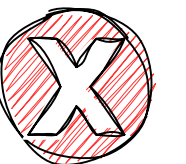

## Multi-agent debat

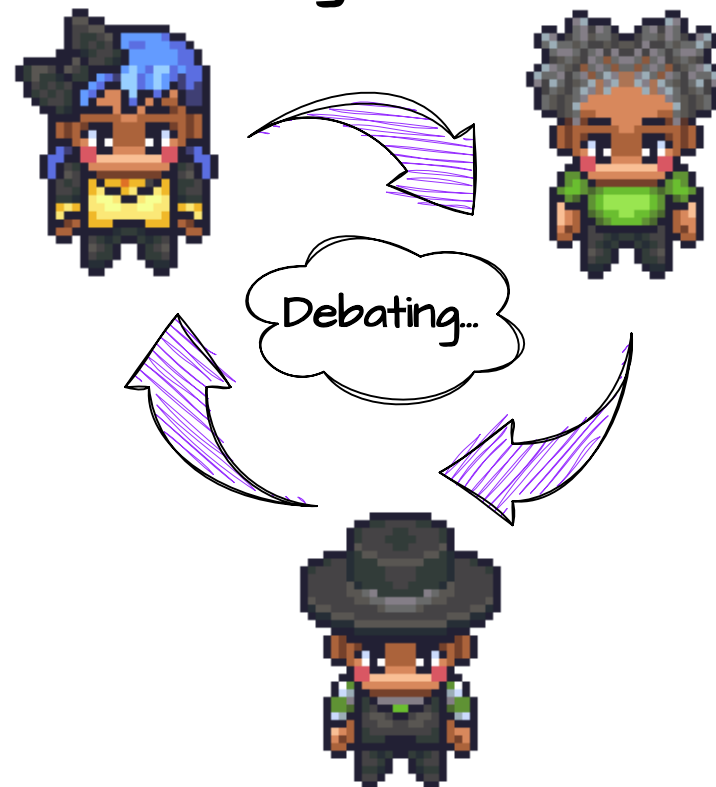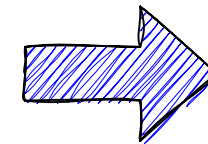

After discussing thoroughly with my co-workers, we are convinced that **ASSISTANT2** is better based on the reason ...

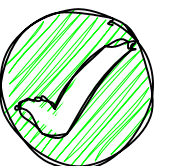

Supplement: supplementary_material [file attachment]
